# Supplementary material
Source: PubMed Central journal article supplement (PMC2901505)

Purified blood eosinophils stimulated with  
FMLP (100 nM, 2 min)

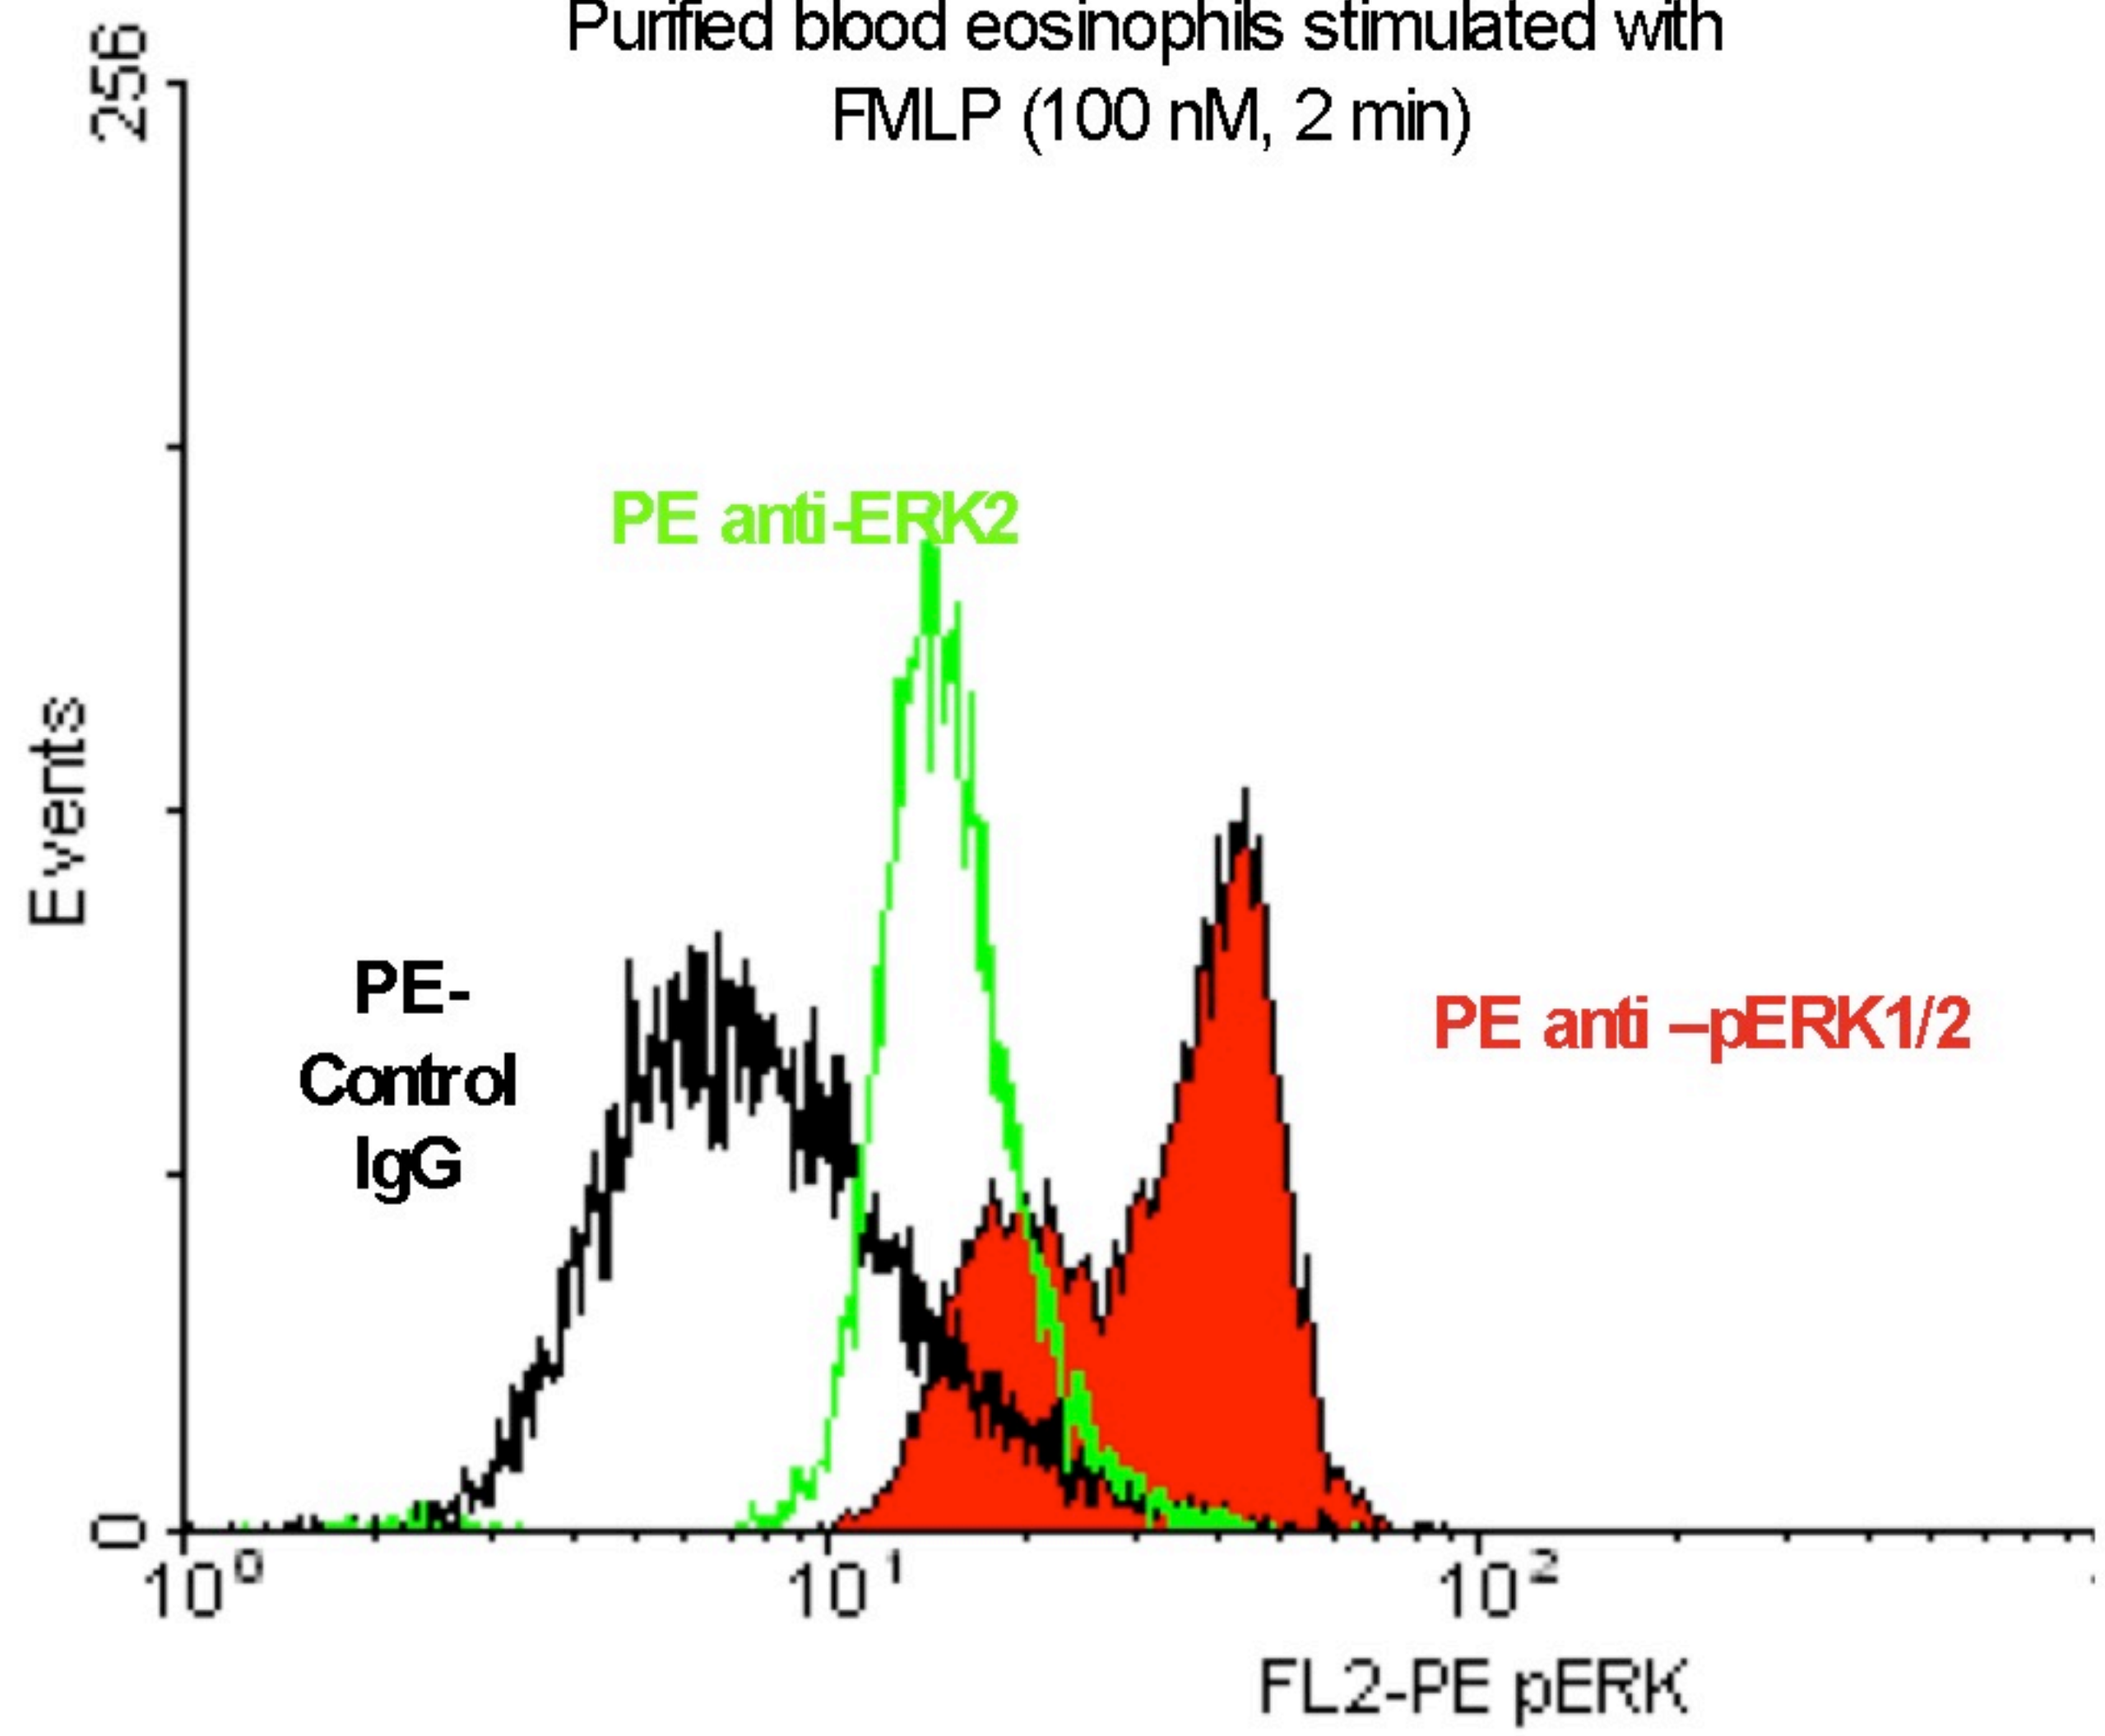

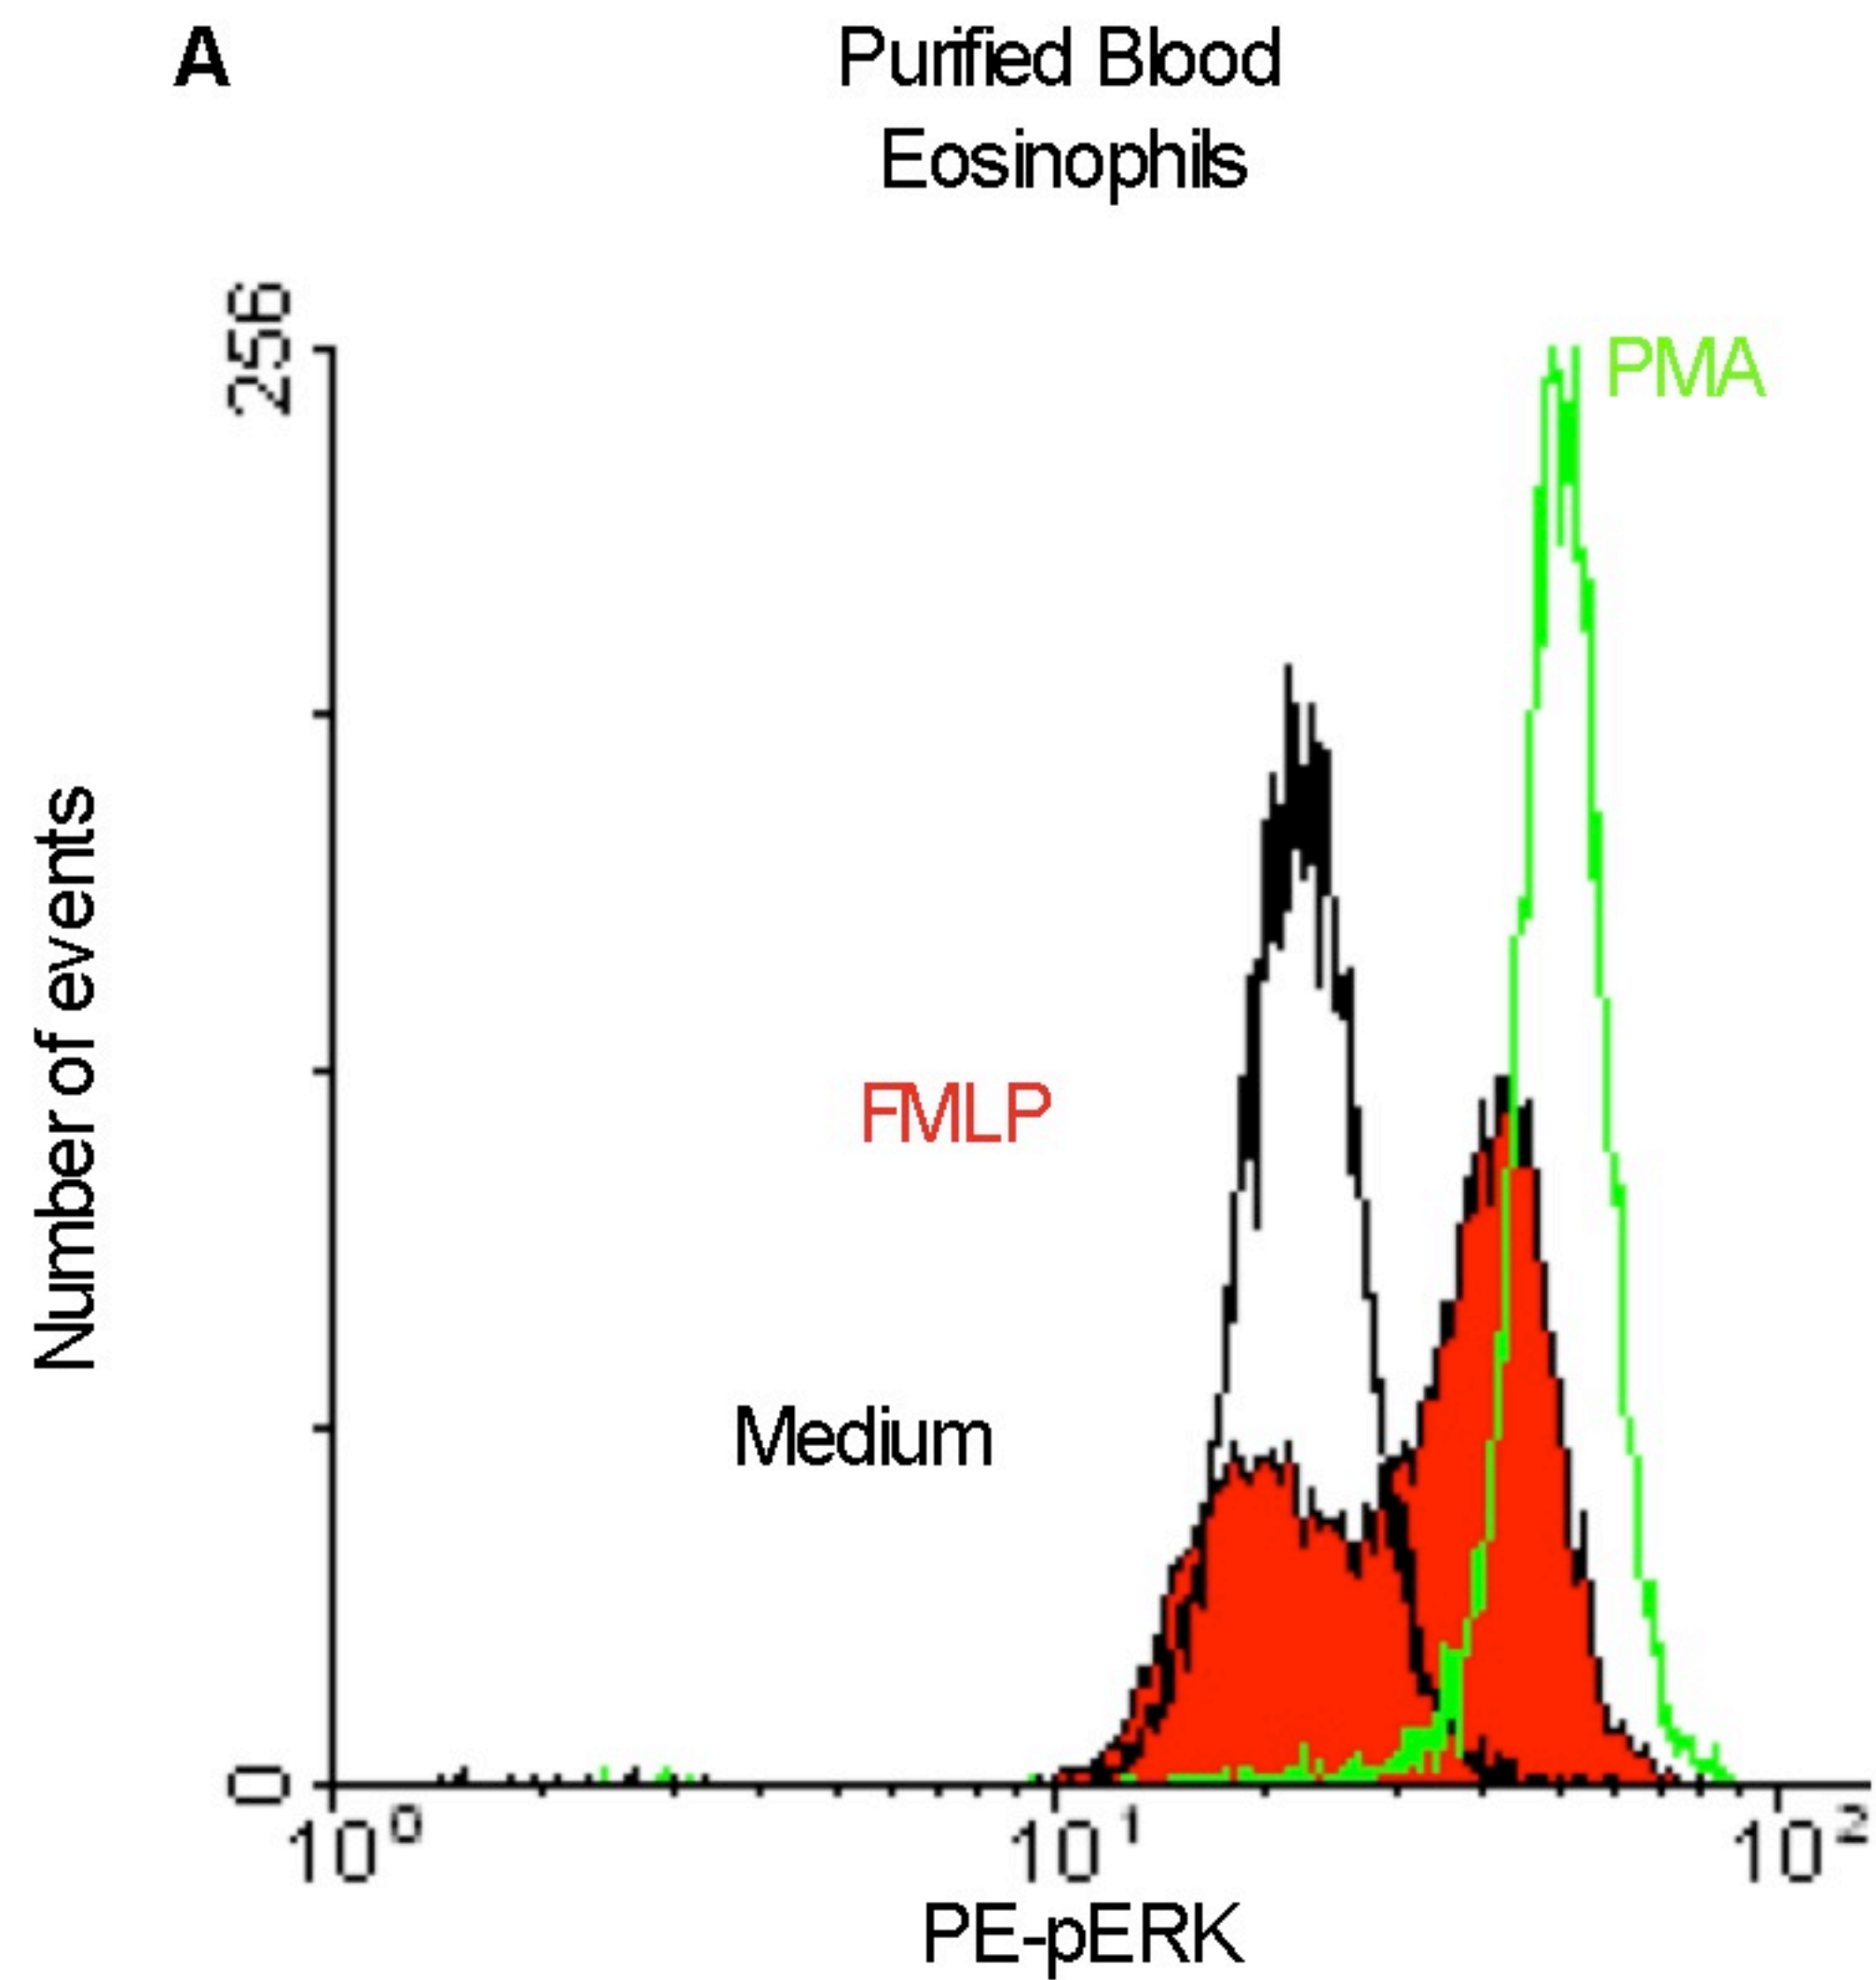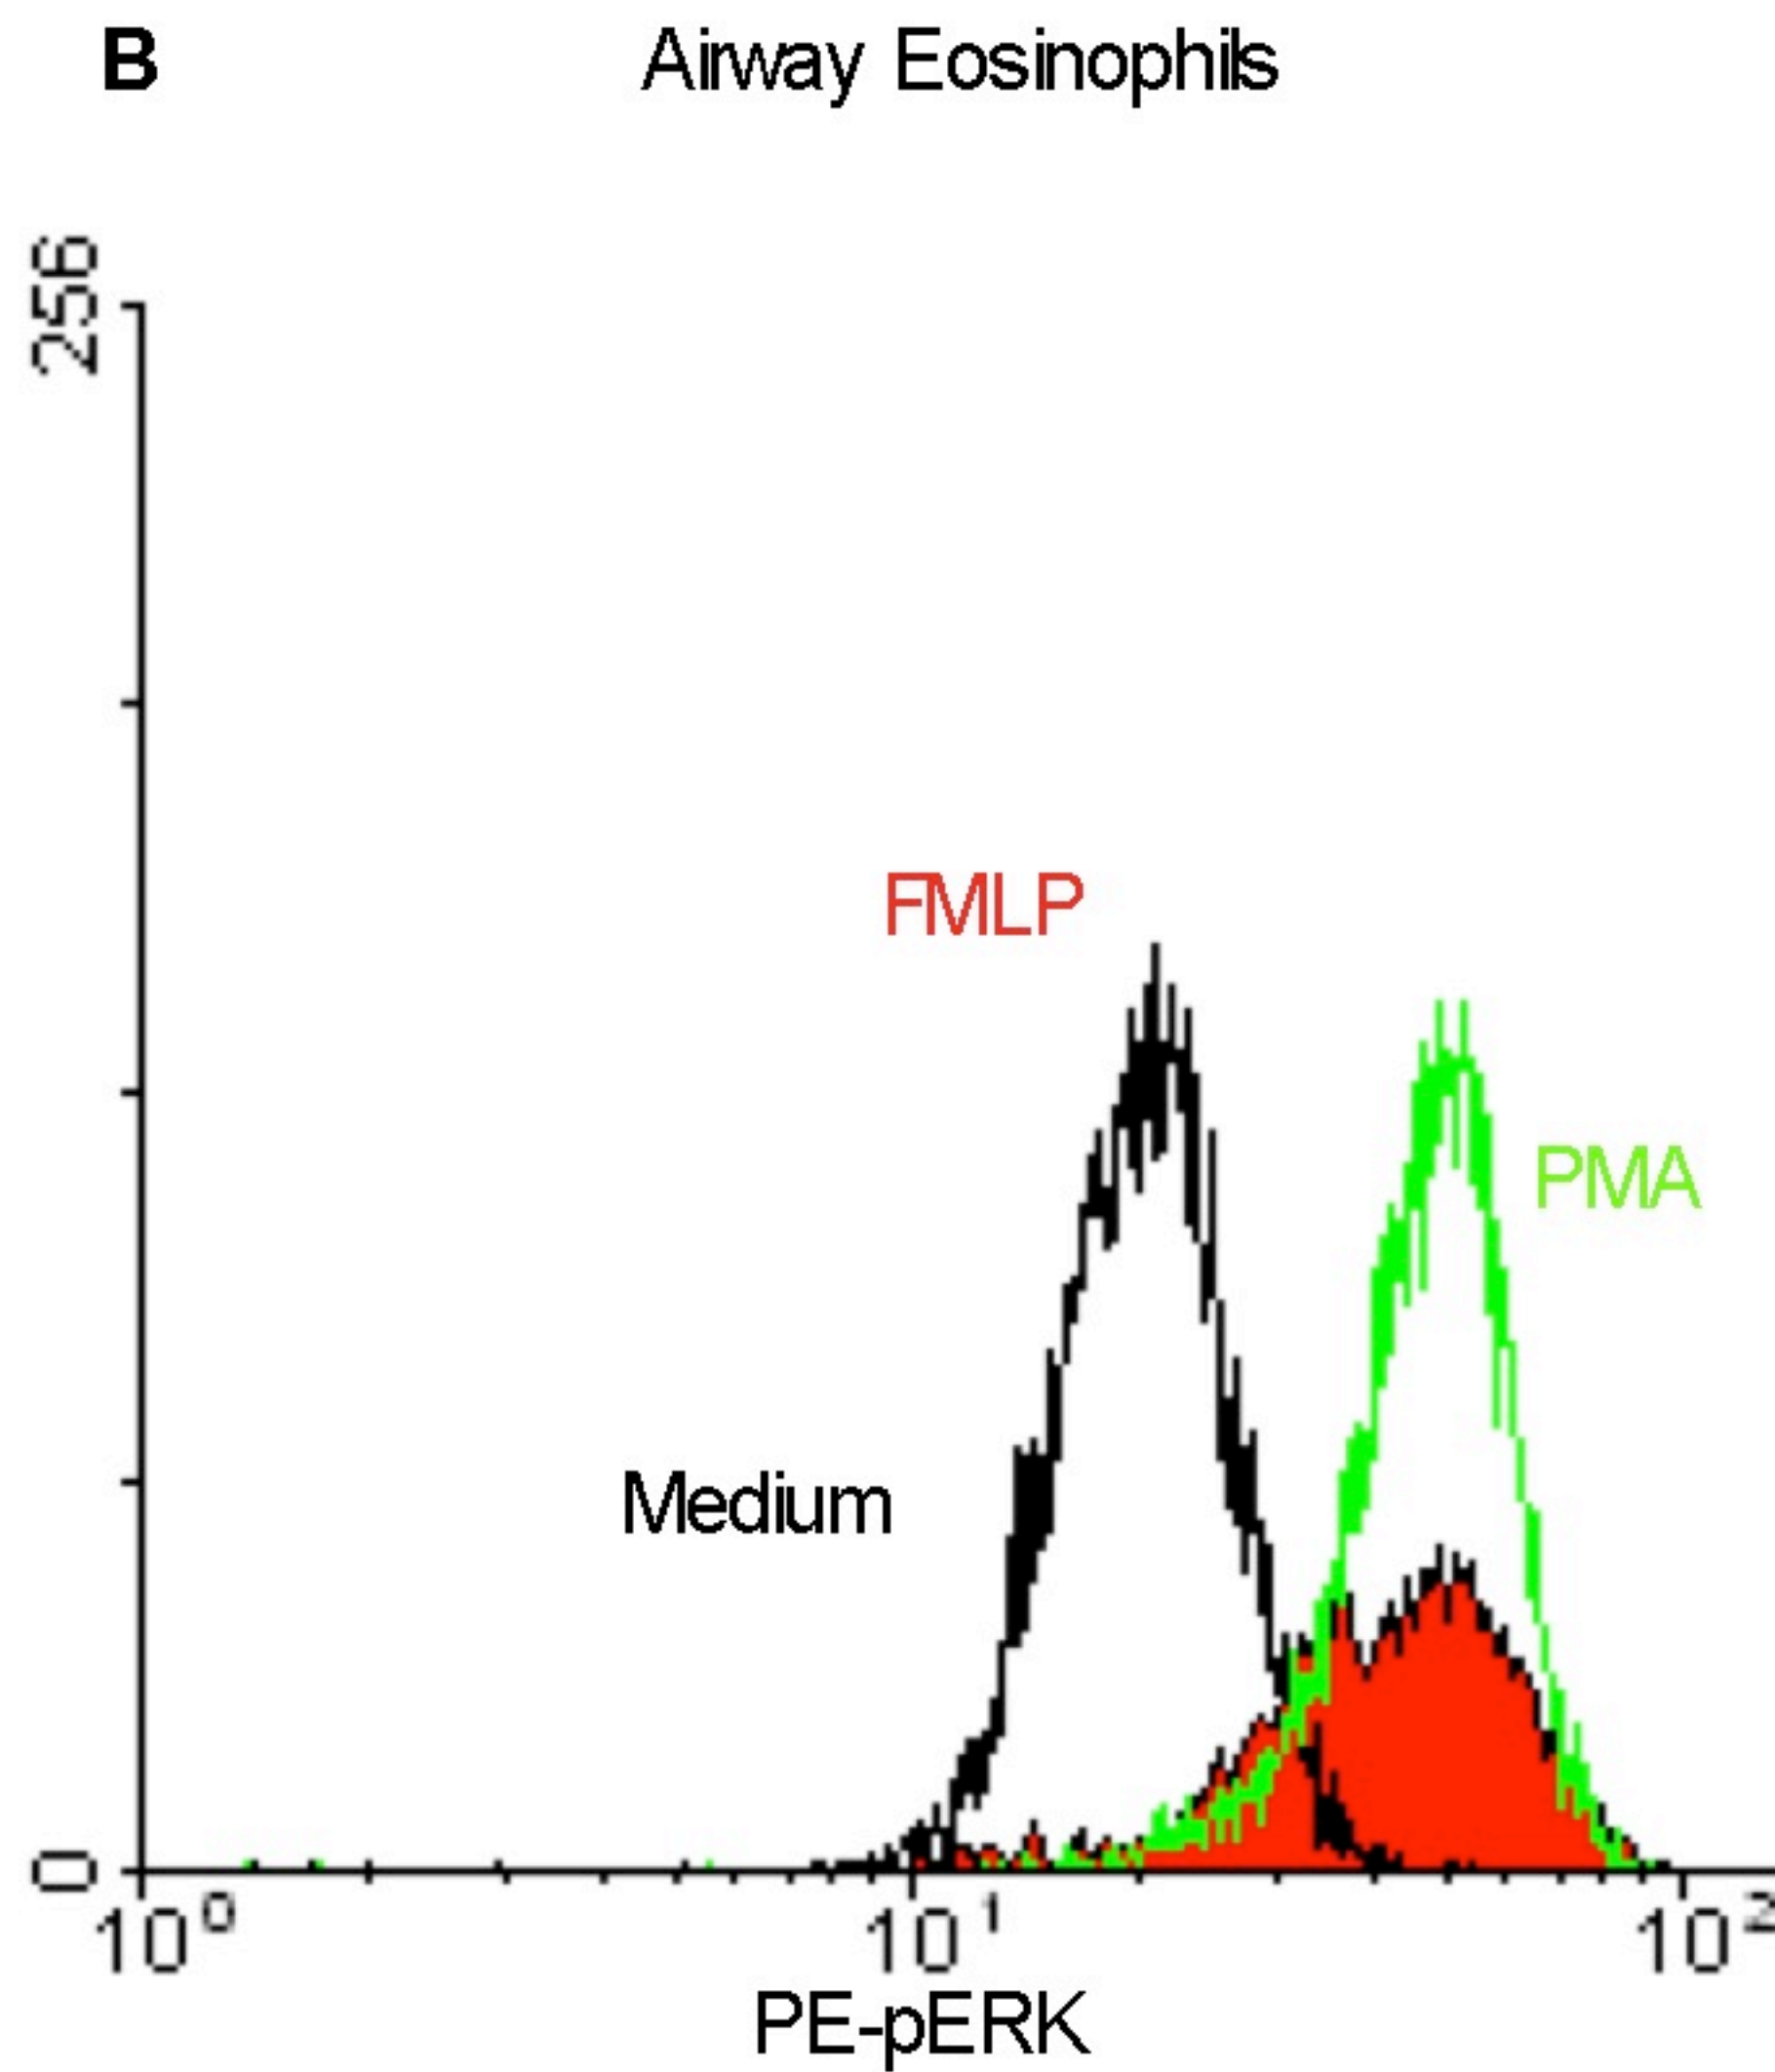

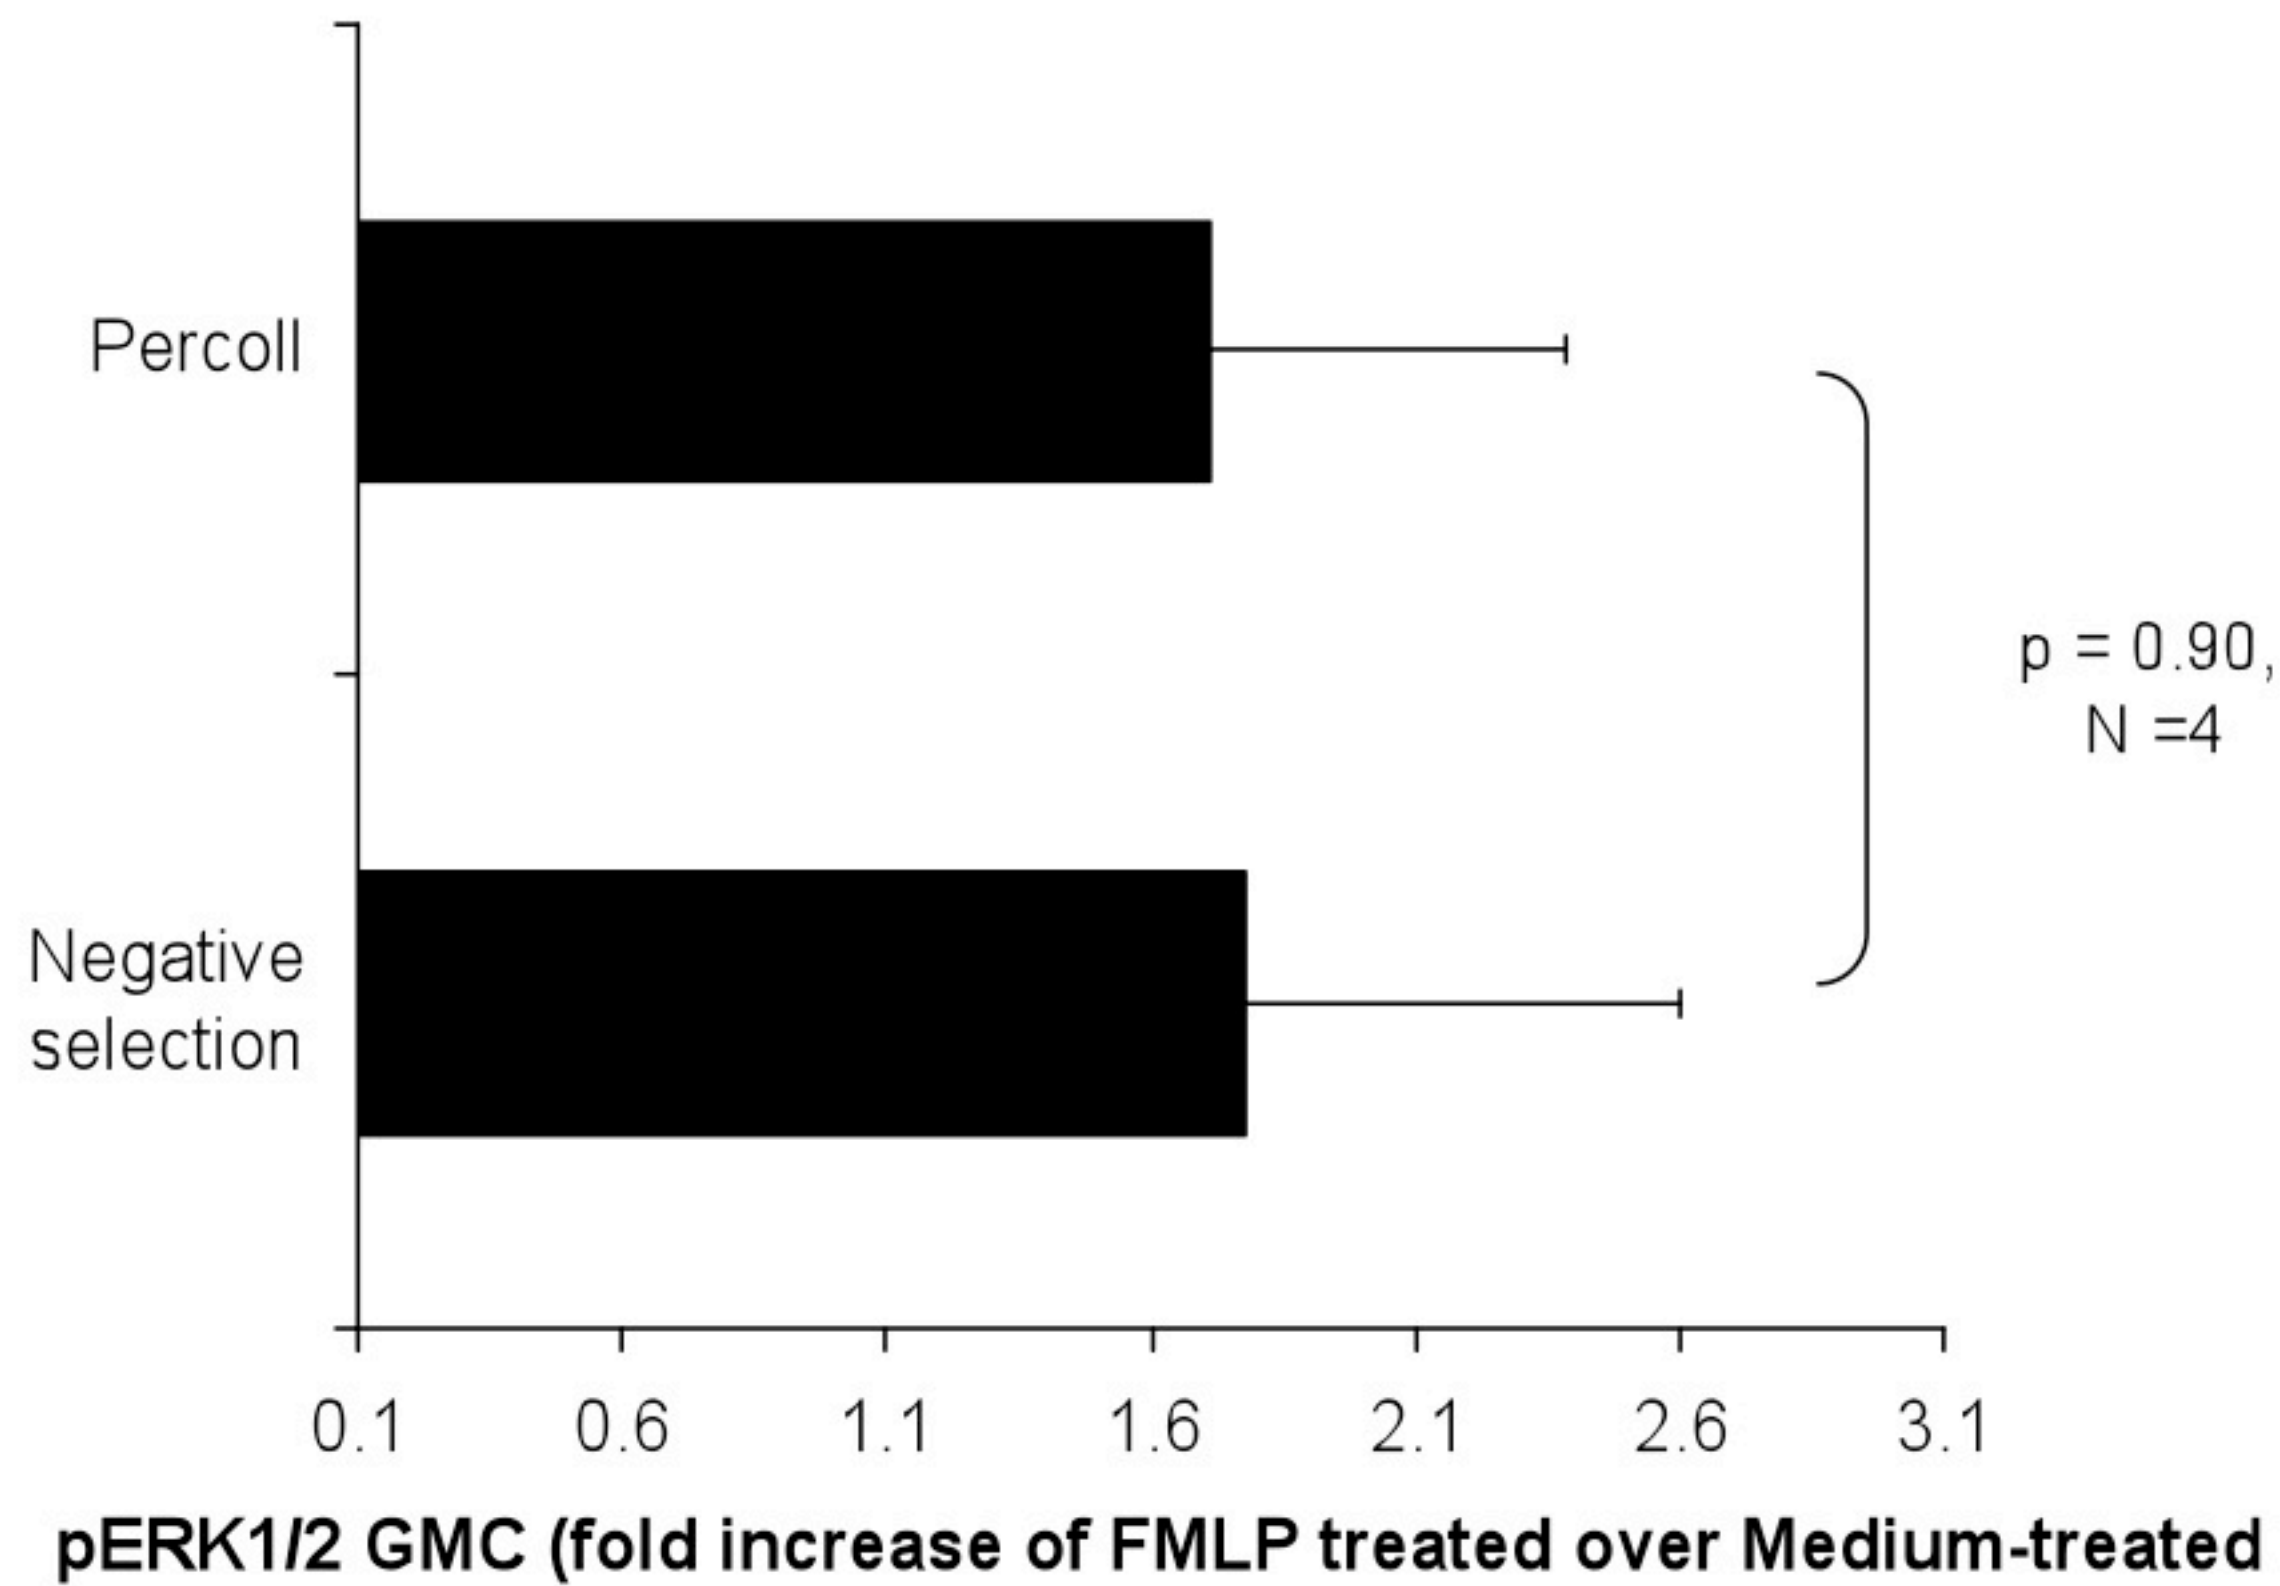

Supplement: NIHMS217469-supplement-01.pdf [file NIHMS217469-supplement-01.pdf]
